# Supplementary material for: The mitochondrial inner membrane protein LETM1 modulates cristae organization through its LETM domain
Source: PubMed Central journal article supplement (PMC7058069; doi:10.1038/s42003-020-0832-5), 2020-03-05
Supplement: 42003_2020_832_MOESM1_ESM.pdf [file 42003_2020_832_MOESM1_ESM.pdf]

**e**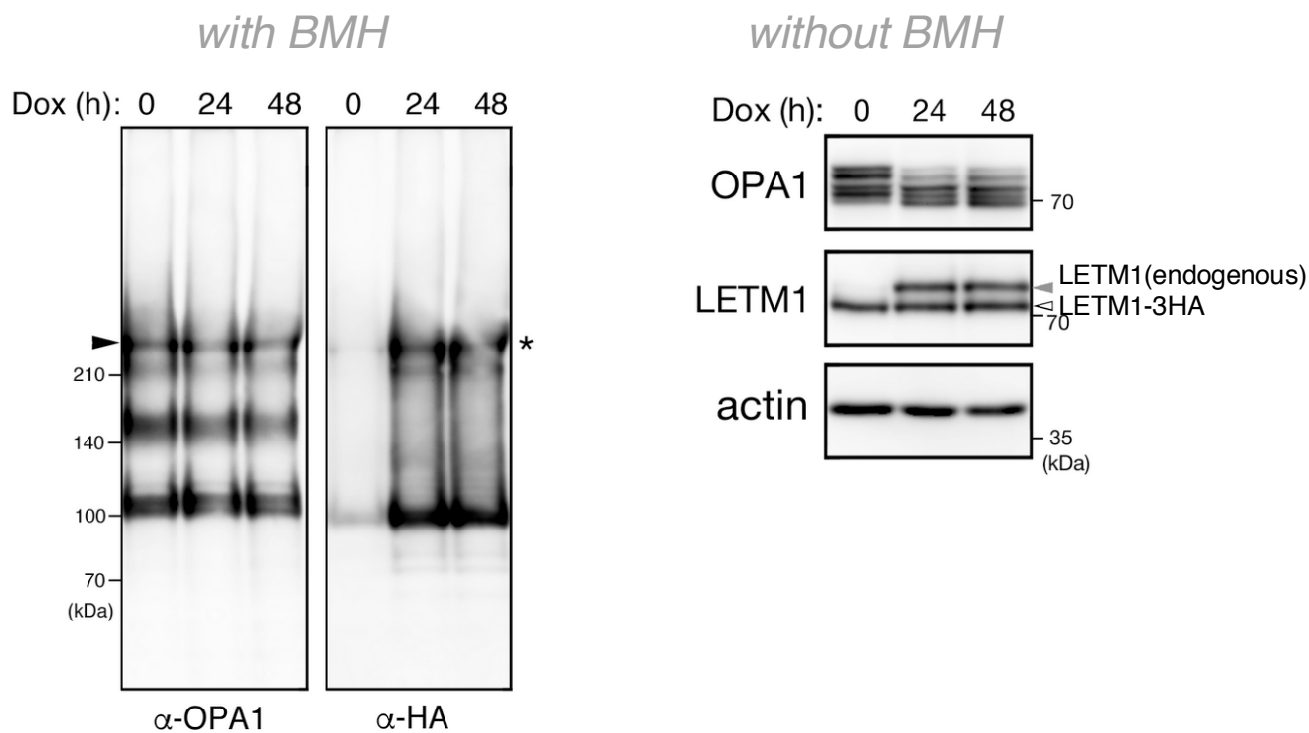**f**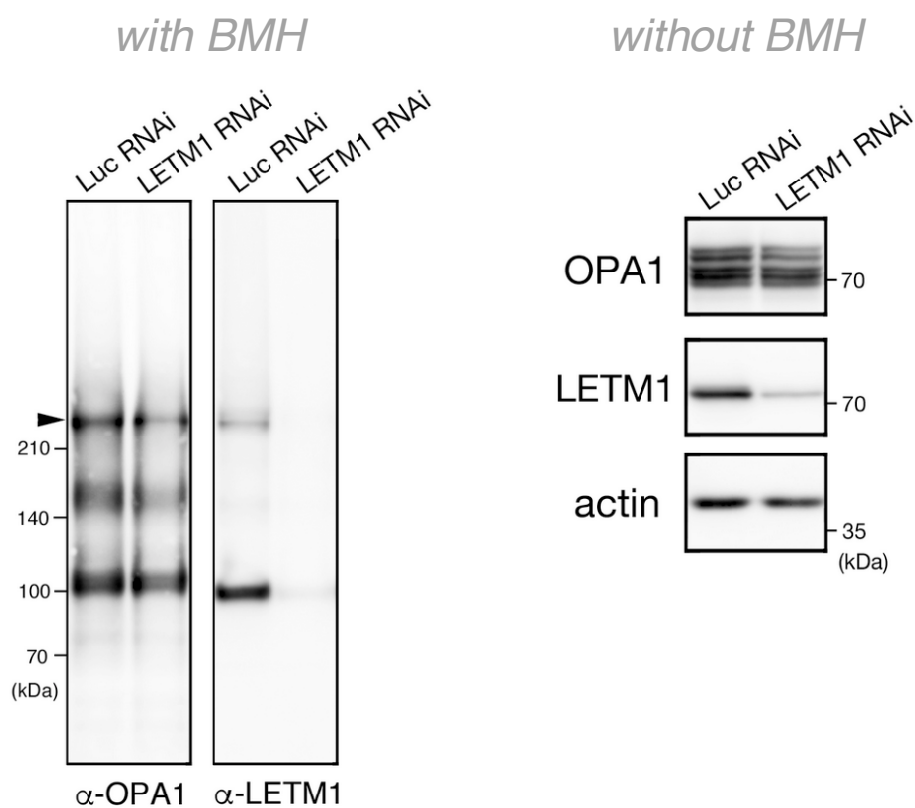

**Supplementary Figure 1. e** HEK cell lines stably expressing LETM1-3HA were cultured in medium containing 1  $\mu$ g/ml doxycycline (Dox) for the indicated times. Cells were harvested and divided into two populations: *With BMH*; cells were subjected to treatment with a membrane-permeable cross linker, BMH and subsequently analyzed by NuPAGE and immunoblot using antibodies to either OPA1, or HA tag. Black arrowhead and asterisk indicate cross-linked oligomers of OPA1 and LETM1-3HA, respectively. *Without BMH*; another population was subjected to analysis by SDS-PAGE and immunoblot without treatment with BMH. Gray and open arrowheads indicate LETM1-3HA proteins and endogenous LETM1, respectively. **f** Cells transfected with either control siRNA (Luc) or siRNA for LETM1 were harvested and divided into two populations. *With BMH*; cells were treated with BMH and the cell lysates were analyzed by NuPAGE and immunoblot using antibodies to either OPA1, or LETM1. Arrowhead indicates cross-linked oligomers of OPA1. *Without BMH*; another population was directly subjected to SDS-PAGE and immunoblot using antibodies to OPA1, LETM1, or actin as a loading control.

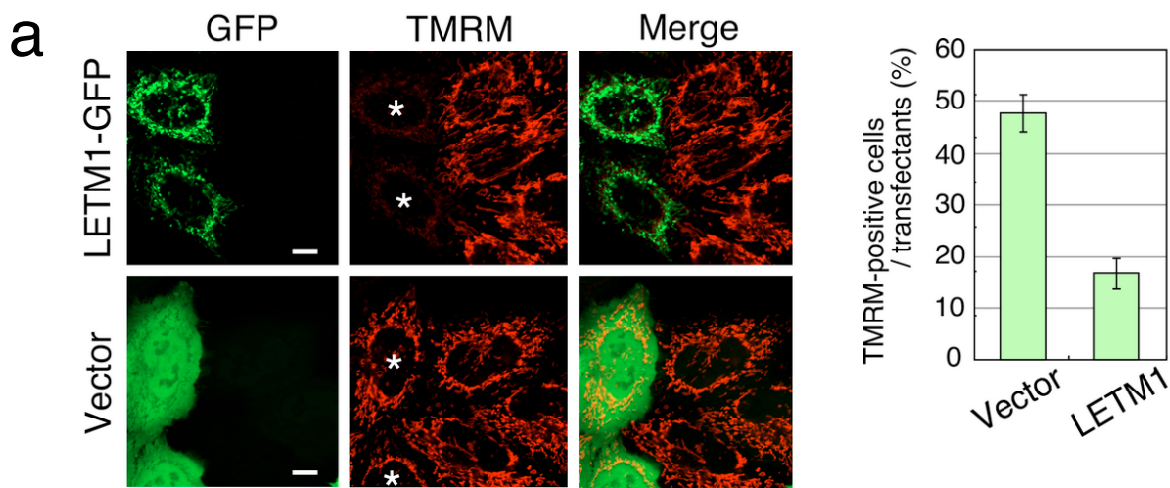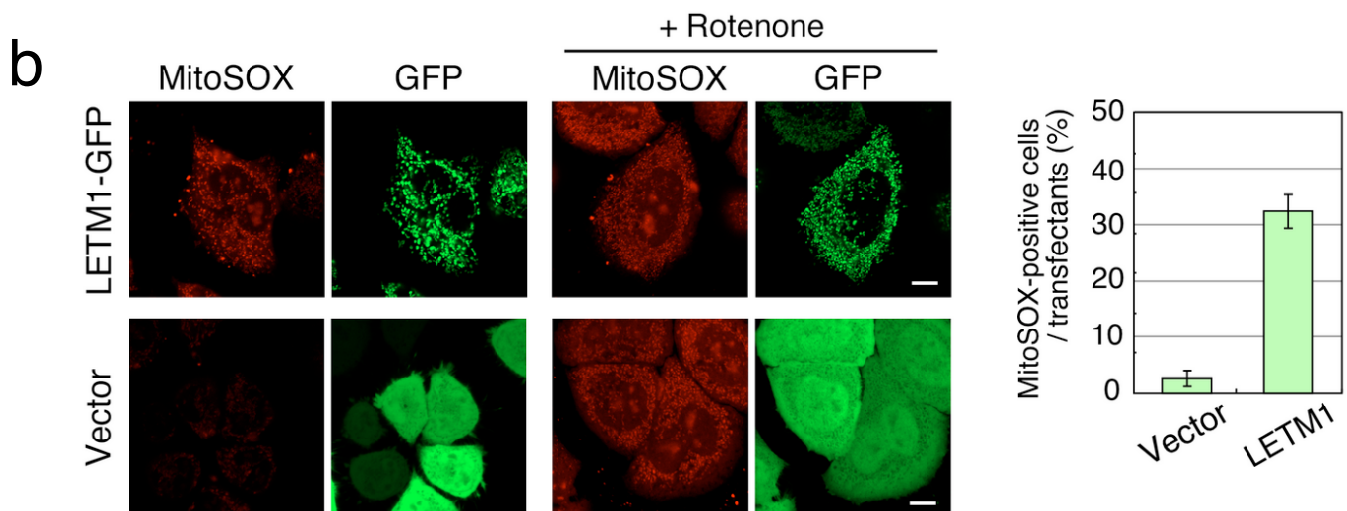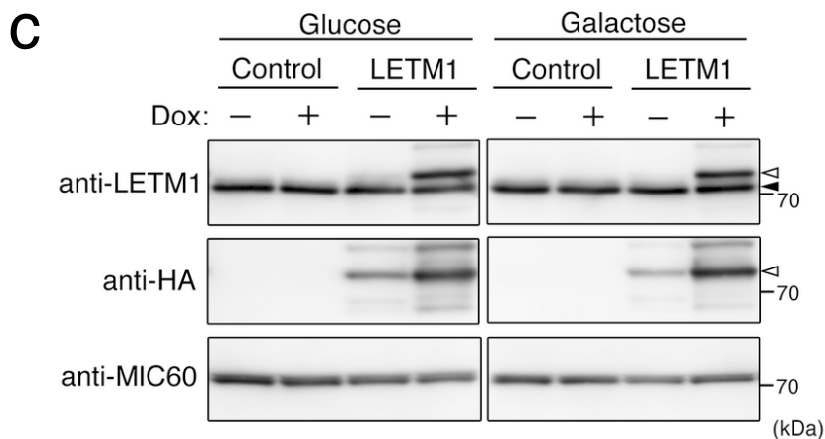

**Supplementary Figure 2.** Effects of increased LETM1 expression on mitochondrial membrane potential and cell growth. **a** HeLa cells were transfected with a plasmid carrying GFP (Vector) or LETM1-GFP and stained with a membrane potential-dependent fluorescent dye, TMRM. Live images were obtained by confocal microscopy. Asterisks indicate LETM1-GFP-expressing cells. Scale bar, 10  $\mu$ m. Data represent the mean  $\pm$  SEM of three independent experiments; >100 individual transfected cells were counted. **b** HeLa cells were transfected with a plasmid carrying GFP (Vector) or LETM1-GFP and stained with a fluorescent superoxide indicator, MitoSOX Red, to monitor mitochondrial reactive oxygen species (ROS). Live images were obtained by confocal microscopy. Rotenone was used for positive control experiments. Scale bar, 10  $\mu$ m. Data represent the mean  $\pm$  SEM of three independent experiments; >100 individual transfected cells were counted. **c** HEK cell lines stably expressing either chloramphenicol acetyltransferase (control) or LETM1-3HA were cultured in medium containing the indicated sugars in the presence or absence of 1  $\mu$ g/ml doxycycline (Dox). Cell lysates were prepared and subjected to SDS-PAGE and immunoblotting using antibodies to either HA tag, LETM1, or MIC60 as a loading control. Solid and open arrowheads indicate endogenous LETM1 and LETM1-3HA proteins, respectively.

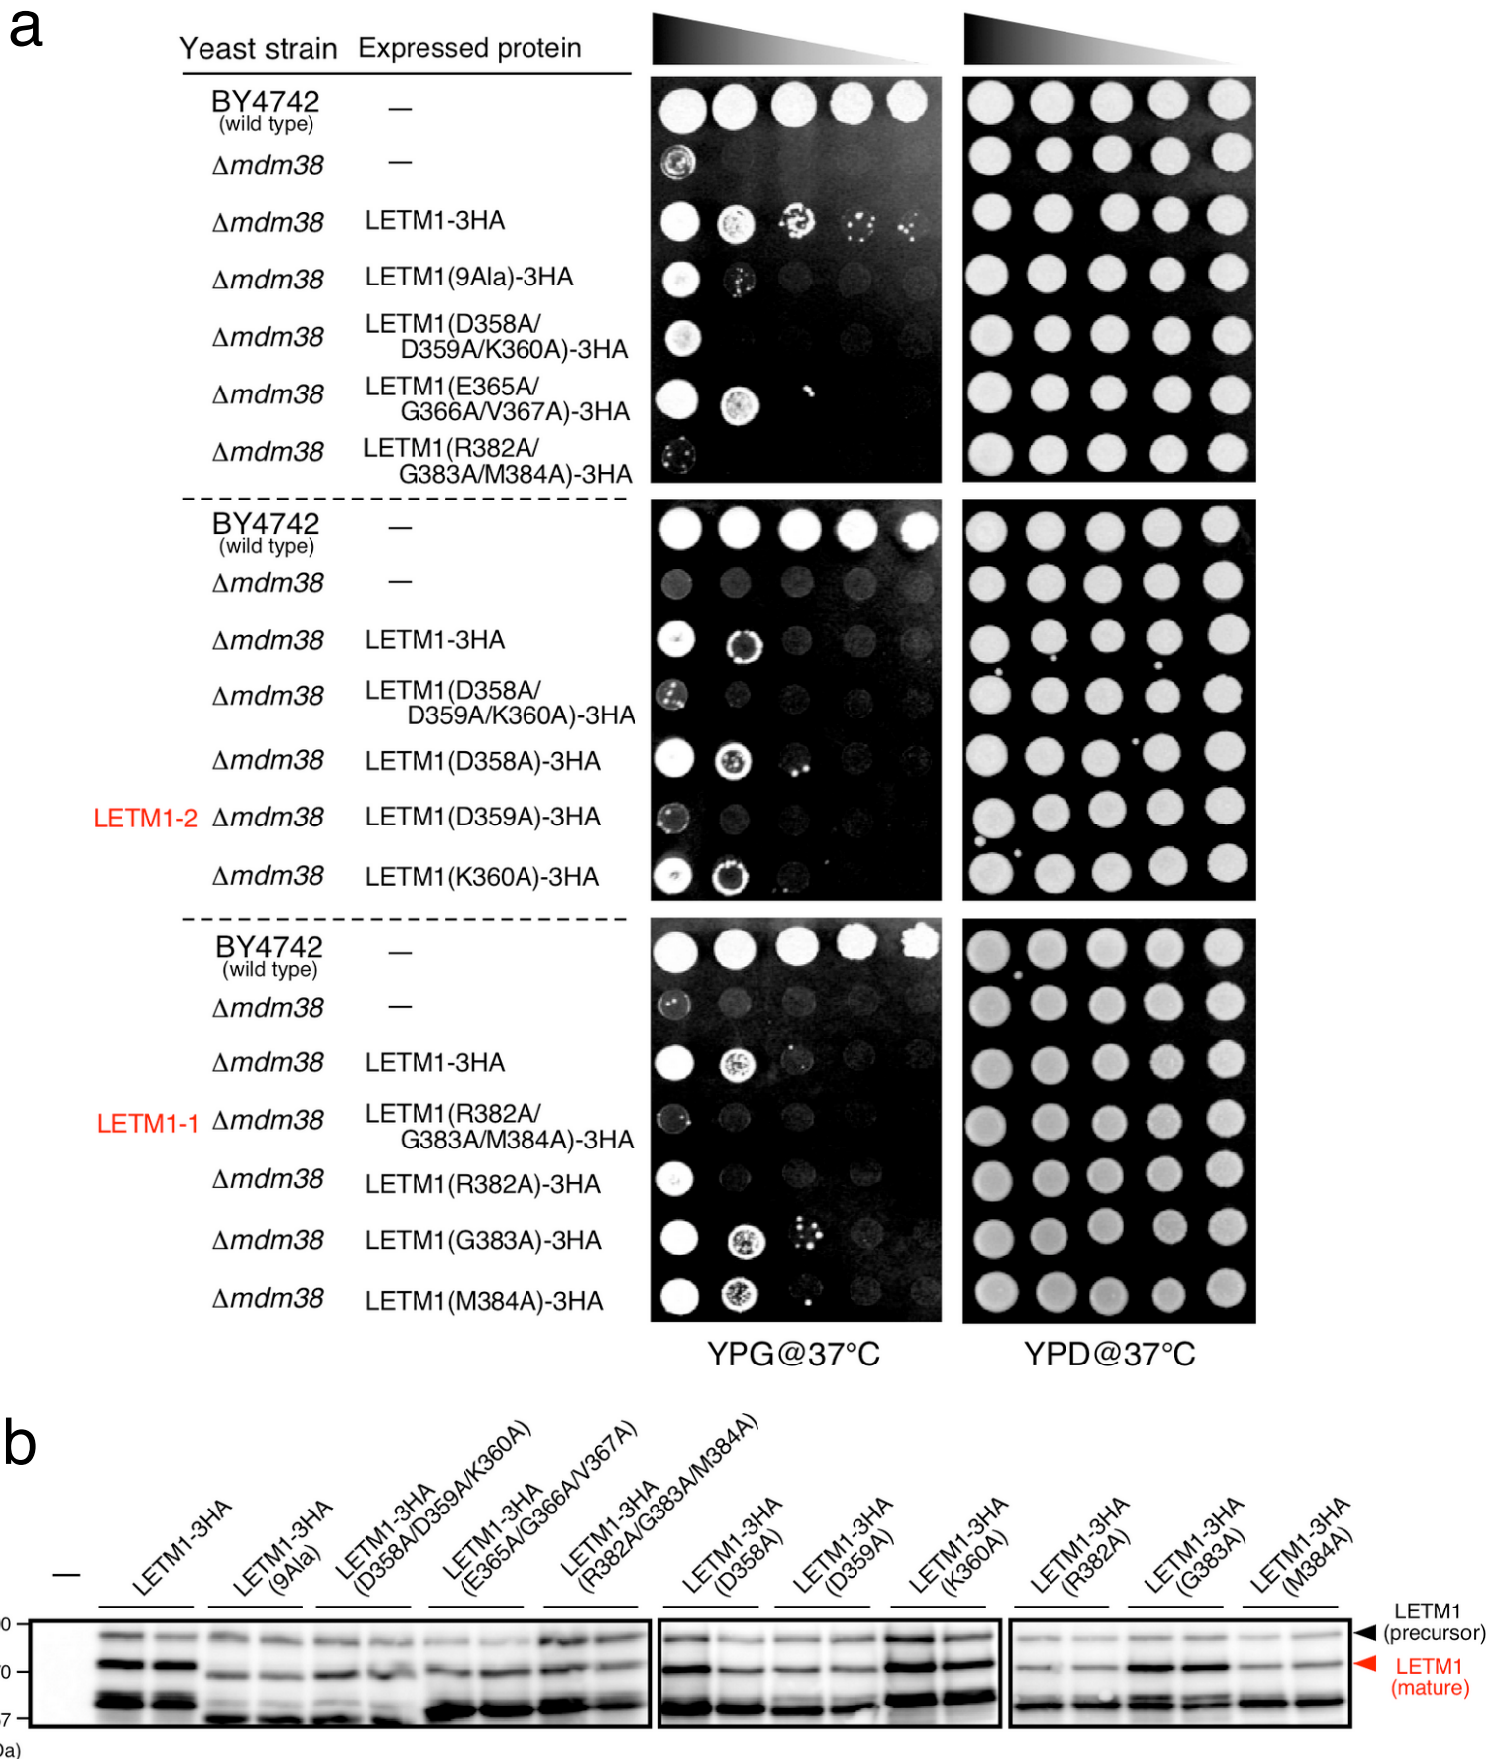

**Supplementary Figure 3.** A screen for the amino acid residues in the LETM domain required for growth complementation in yeast *mdm38* mutants. **a** Growth phenotypes of yeast *mdm38* mutant cells expressing LETM1 mutants. Serial dilutions of wild-type (BY4742) and  $\Delta mdm38$  mutant cells expressing the indicated proteins were plated at 37°C onto rich medium containing either glycerol (YPG) or dextrose (YPD). **b** Cell lysates were prepared from yeast cells expressing the indicated proteins and subjected to SDS-PAGE and immunoblotting using antibody to HA tag. Black and red arrowheads indicate the precursor and mature forms of LETM1-3HA, respectively.



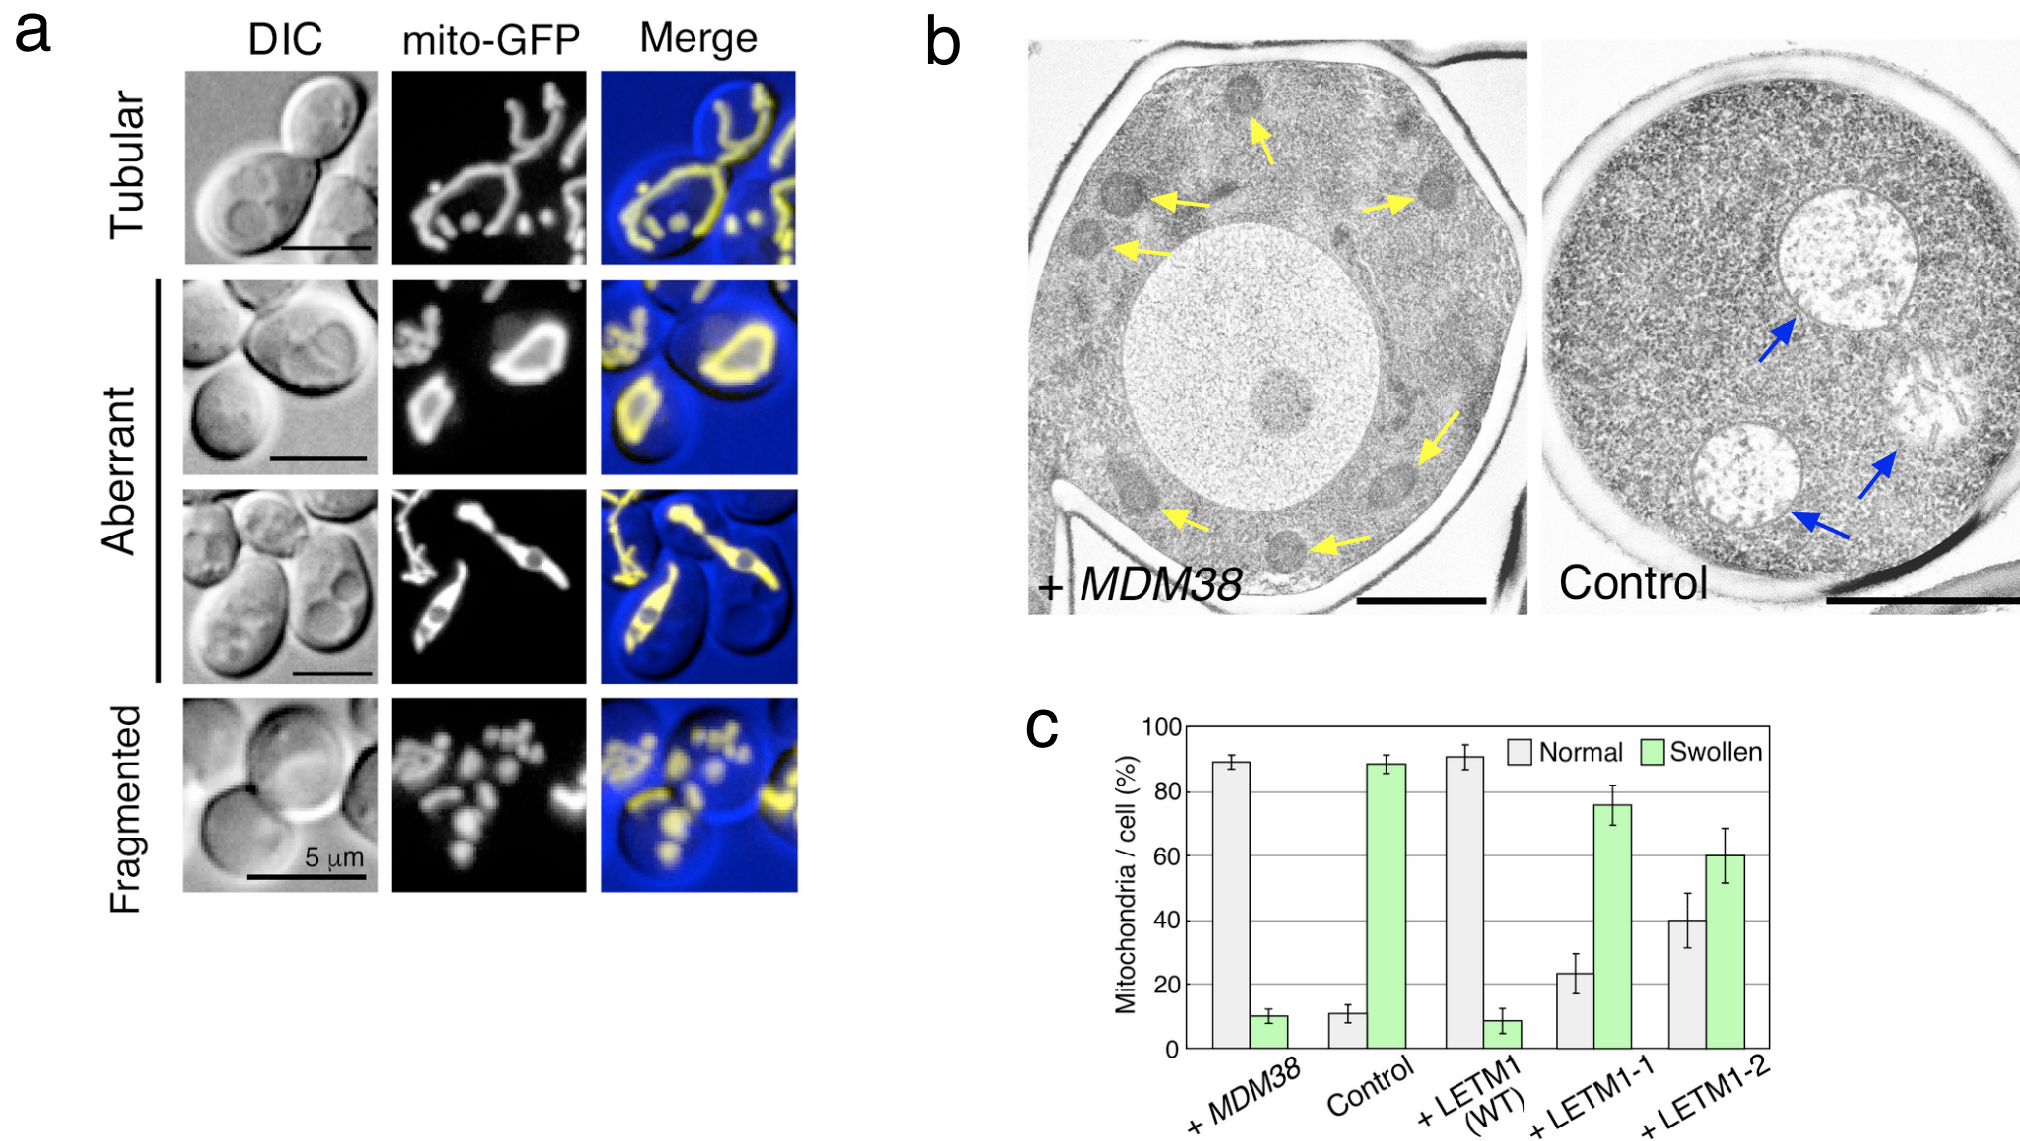

**Supplementary Figure 4.** Analysis of mitochondrial morphology of yeast *mdm38* mutant cells. **a** Live fluorescent images of  $\Delta mdm38$  cells carrying mitochondria-targeted GFP were obtained by confocal microscopy and classified into three categories (tubular, aberrant, and fragmented). Scale bar, 5  $\mu$ m. **b**  $\Delta mdm38$  mutant cells carrying a plasmid containing a yeast *MDM38* gene or control plasmid were fixed, and thin sections were visualized by electron microscopy. Yellow and blue arrows indicate normal and swollen mitochondria, respectively. Scale bar, 1  $\mu$ m. **c** Mitochondrial morphology of 25 individual cells in the thin sections was scored. Data represent the mean  $\pm$  SEM.

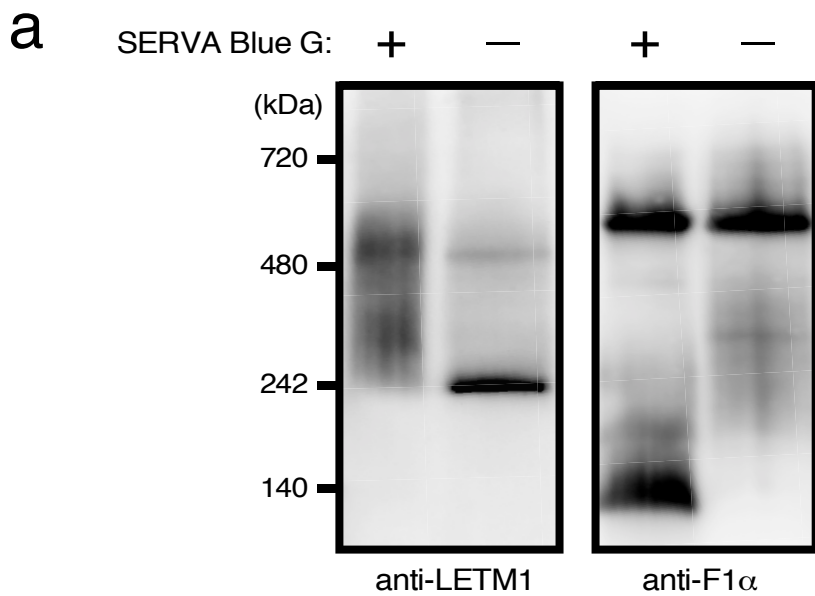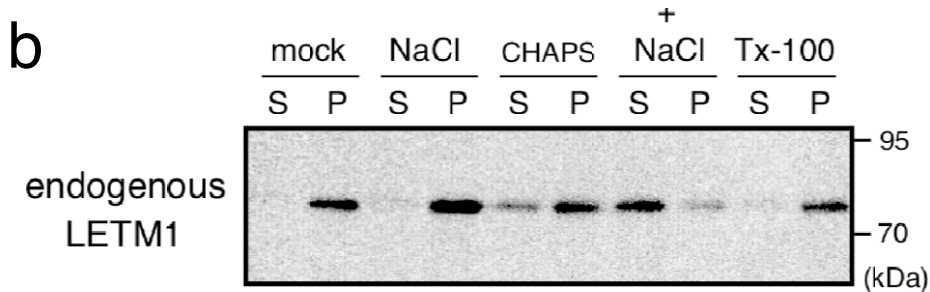

**c**

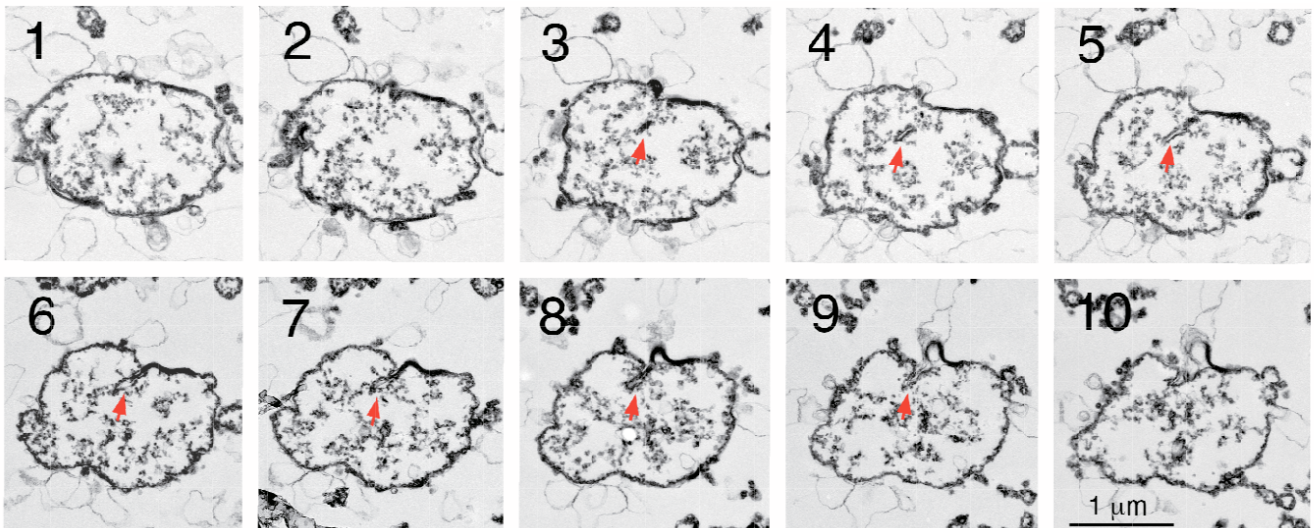

**Supplementary Figure 5.** LETM1 facilitates *in vitro* membrane invagination. **a** Extraction of endogenous LETM1 protein with detergents. Mitochondria-enriched fractions prepared from HeLa cells were treated with the indicated detergents in the absence or presence of 100 mM NaCl and subjected to immunoblotting using anti-LETM1 antibody. **b** Digitonin-solubilized mitochondrial fractions were analyzed by clear-native PAGE in the absence or presence of dye (SERVA Blue G) and subjected to immunoblotting using anti-LETM1 antibody. **c** Electron microscopic images of serial sections of a proteoliposome containing wild-type His-LETM1. Arrows indicate membrane invagination. These images were used for the three-dimensional reconstitution shown in Fig. 4d and Supplementary Movie 1.

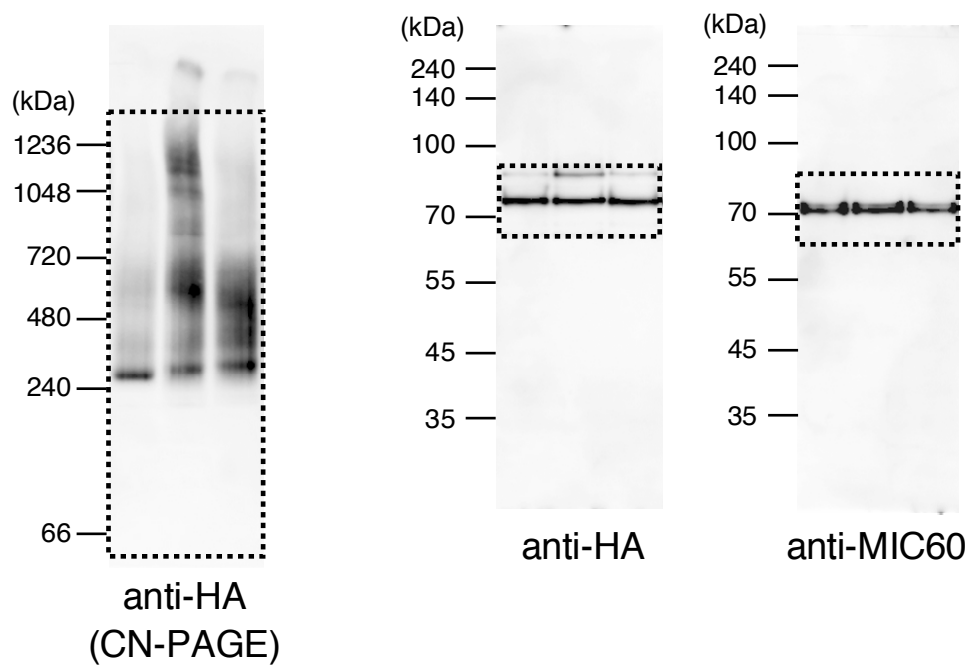

**Supplementary Figure 6.** Images of uncropped immunoblots for Fig. 3c.
