# Supplementary material for: The mitochondrial inner membrane protein LETM1 modulates cristae organization through its LETM domain
Source: PubMed Central journal article supplement (PMC7058069; doi:10.1038/s42003-020-0832-5), 2020-03-05
Supplement: 42003_2020_832_MOESM2_ESM.pdf [file 42003_2020_832_MOESM2_ESM.pdf]

## **Description of additional supplementary items**

**Supplementary Data1** Source data of this study.

The source data underlying plots shown in this paper was provided.

**Supplementary Movie 1.** A movie of three-dimensional images reconstituted from serial sections of the proteoliposome containing wild-type His-LETM1 shown in Supplementary figure 5c.
